# Supplementary material for: Homogeneity and tolerance to heat of monolayer MoS2 on SiO2 and h-BN
Source: Royal Society of Chemistry journal article supplement (doi:10.1039/c8ra01849a), 2018-01-01
Supplement: c8ra01849a1.pdf [file c8ra01849a1.pdf]

## Supplementary Information

### **Homogeneity and tolerance to heat of monolayer MoS<sub>2</sub> on SiO<sub>2</sub> and h-BN**

Ho-Jong Kim,<sup>a,d</sup> Daehee Kim,<sup>a</sup> Suyong Jung,<sup>a</sup> Myung-Ho Bae,<sup>a</sup> Sam Nyung Yi,<sup>b</sup> Kenji Watanabe,<sup>c</sup> Takashi Taniguchi,<sup>c</sup> Soo Kyung Chang<sup>d</sup> and Dong Han Ha<sup>\*a</sup>

<sup>a</sup>*Quantum Technology Institute, Korea Research Institute of Standards and Science, Daejeon 34113, Republic of Korea*

<sup>b</sup>*Department of Electronic Material Engineering, Korea Maritime and Ocean University, Busan 49112, Republic of Korea*

<sup>c</sup>*National Institute for Materials Science, 1-1 Namiki, Tsukuba 305-0044, Japan*

<sup>d</sup>*Department of Physics, Yonsei University, Seoul 03722, Republic of Korea*

\*E-mail: [dhha@kriss.re.kr](mailto:dhha@kriss.re.kr)

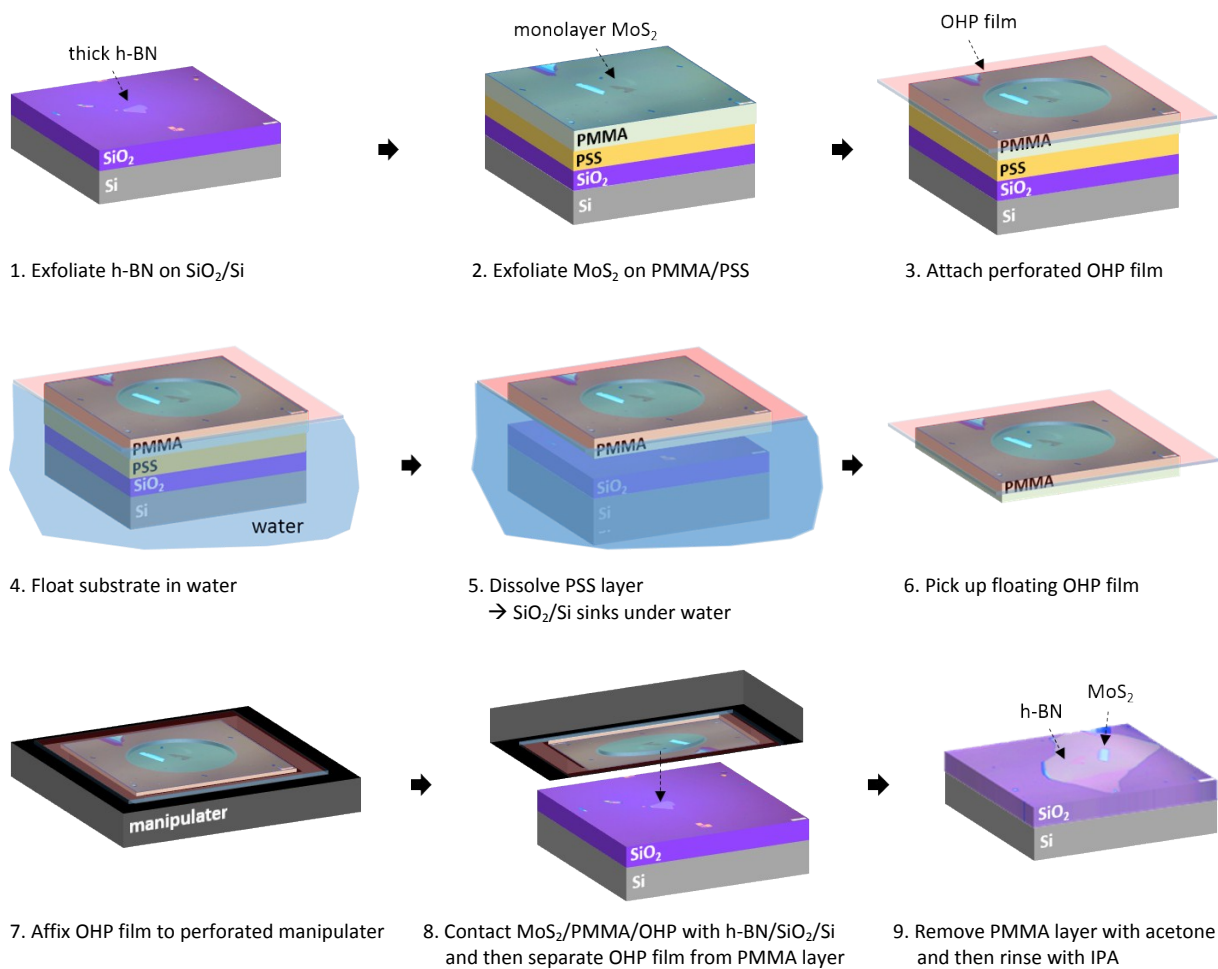

\* PMMA: poly(methyl methacrylate) / PSS: poly-styrenesulfonic / OHP: overhead projector / IPA: isopropyl alcohol

**Fig. S1** Schematic diagram of the experimental process to fabricate MoS<sub>2</sub> and h-BN vertical heterostructures on SiO<sub>2</sub>/Si substrate.
